# Supplementary material
Source: PubMed Central journal article supplement (PMC2736076)
Supplement: en.2009-0137_1.pdf [file en.2009-0137_1.pdf]

**Supplementary Table 1: Primers used for PCR analysis.**

| <b>Gene</b>          | <b>Fwd 5'-</b>                | <b>Rev 5'-</b>                    | <b>Probe 5'-/ Primer Bank ID</b> |
|----------------------|-------------------------------|-----------------------------------|----------------------------------|
| <b>18S</b>           | CGC CGC TAG AGG<br>TGA AAT TC | TTG GCA AAT GCT TTC<br>GCT C      | CAC CAC CAC CCA CGG<br>AAT CG    |
| <b>CD68</b>          | ACT TCG GGC CAT GGT<br>TCT CT | GGC TGG TAG GTT<br>GAT TGT CGT    |                                  |
| <b>Chi3B3</b>        | GTC TGG CCC CTG GAC<br>ATG    | AGA GGG AAA TGT<br>CTC TGG TGA CA |                                  |
| <b>Arg1</b>          | CAT GGG CA ACCT<br>GTG TCC TT | TCC TGG TAC ATC<br>TGG GAA CTT TC |                                  |
| <b>iNOS</b>          | GGC AGC CTG TGA<br>GAC CTT TG | CGT TTC GGG ATC<br>TGA ATG TGA    |                                  |
| <b>CD11c</b>         |                               |                                   | 10946646a1                       |
| <b>MCP-1</b>         |                               |                                   | 6755430a1                        |
| <b>IL-10</b>         |                               |                                   | 6754318a1                        |
| <b>IL-18</b>         |                               |                                   | 6680413a1                        |
| <b>cyclin<br/>A2</b> |                               |                                   | 6753308a1                        |
| <b>cyclin B</b>      |                               |                                   | 50615a1                          |

Table1: Primers were purchased from IDT (Integrated DNA Technologies Inc.), San Diego, CA, USA
